# Supplementary material
Source: PubMed Central journal article supplement (PMC6441960)
Supplement: NIHMS1512783-supplement-Supplemental_materials.pdf [file NIHMS1512783-supplement-Supplemental_materials.pdf]

Supplemental Table 1. Population information

| Populations | Population detail                                               | Sample ID          | Number of sample | Subtotal |
|-------------|-----------------------------------------------------------------|--------------------|------------------|----------|
| EUR         | CEU: Utah residents with northern and western European ancestry | NA06984 to NA12890 | 85               | 379      |
|             | FIN: Finnish in Finland                                         | HG00171 to HG00384 | 93               |          |
|             | GBR: British in England and Scotland                            | HG00096 to HG01334 | 89               |          |
|             | IBS: Iberian populations in Spain                               | HG01515 to HG01626 | 14               |          |
|             | TSI: Toscani in Italy                                           | NA20502 to NA20828 | 98               |          |
| ASN         | CHB: Han Chinese in Beijing                                     | NA18525 to NA18757 | 97               | 286      |
|             | CHS: Southern Han Chinese                                       | HG00403 to HG00708 | 100              |          |
|             | JPT: Japanese in Tokyo, Japan                                   | NA18939 to NA19088 | 89               |          |
| AFR         | ASW: African Ancestry in southwest, USA                         | NA19625 to NA20414 | 61               | 246      |
|             | LWK: Luhya in webuye, Kenya                                     | NA19020 to NA19474 | 97               |          |
|             | YRI: Yoruba in Ibadan, Nigeria                                  | NA18486 to NA19257 | 88               |          |
| AMR         | CLM: Colombian in Medellin, Colombia                            | HG01112 to HG01551 | 60               | 181      |
|             | MXL: Mexican Ancestry in Los Angeles, CA                        | NA19648 to NA19795 | 66               |          |
|             | PUR: Puerto Rican in Puerto Rico                                | HG00553 to HG01204 | 55               |          |
| total       |                                                                 |                    | 1092             |          |

Supplemental Table 2. SNP information

| SNP   | Chr position* | rs#        | allele name | nucleotide change# |
|-------|---------------|------------|-------------|--------------------|
| SNP1  | 42412711      | rs5758550  | enhancer    | A>G                |
| SNP2  | 42523610      | rs59421388 | *29         | G>A                |
| SNP3  | 42523805      | rs28371725 | *41         | G>A                |
| SNP4  | 42523943      | rs16947    | *2          | C>T                |
| SNP5  | 42524175      | rs5030656  | *9          | delete AGA         |
| SNP6  | 42524244      | rs35742686 | *3          | delete A           |
| SNP7  | 42524974      | rs3892097  | *4          | G>A                |
| SNP8  | 42525086      | rs5030655  | *6          | delete T           |
| SNP9  | 42525772      | rs28371706 | *17         | C>T                |
| SNP10 | 42526694      | rs1065852  | *10         | C>T                |
| SNP11 | 42528382      | rs1080985  | promoter    | C>G                |

note: \* Chromosome position in GRCh37 coordinate; # chromosome minus strain as reference

Supplemental Table 3. Demographics of human liver microsomes (HLMs).

| <b>Number of HLM</b> | <b>Mean age</b> | <b>Race</b>      | <b>Gender</b>      |
|----------------------|-----------------|------------------|--------------------|
| 109                  | 49±13 y         | Caucasain        | male=58; female=51 |
| 13                   | 51±15 y         | African American | male=8; female=5   |

Supplemental Table 4. Detail information of other functional SNPs in individuals carrying haplotypes containing rs5758550 and/or rs16947. The table shows the number of other functional SNPs (alleles) located on the same or the opposite allele as H1, H2 or H3 in different populations.

| Haplotypes                 | Other alleles (SNPs)       | EUR            |                    | ASN            |                    | AFR            |                    | AMR            |                    |
|----------------------------|----------------------------|----------------|--------------------|----------------|--------------------|----------------|--------------------|----------------|--------------------|
|                            |                            | Allele count   |                    | Allele count   |                    | Allele count   |                    | Allele count   |                    |
|                            |                            | On same allele | On opposite allele |
| rs5758550, no rs16947 (H1) | *4 (rs3892097 & rs1065852) | 5              | 1 <sup>a</sup>     |                |                    | 1              | 3                  | 2              | 1                  |
|                            | *3 (rs35742686)            | 1              |                    |                |                    |                |                    |                |                    |
|                            | *10 (rs1065852)            |                |                    | 4              | 1 <sup>a</sup>     |                |                    |                |                    |
|                            | *6 (rs5030655)             |                | 1                  |                |                    |                |                    |                |                    |
| rs5758550 + rs16947 (H2)   | *17 (rs28371706)           |                |                    |                |                    |                | 12                 |                |                    |
|                            | *4 (rs3892097 & rs1065852) |                | 31                 |                |                    |                | 9                  |                | 6                  |
|                            | *3 (rs35742686)            |                | 2                  |                |                    |                |                    |                |                    |
|                            | *6 (rs5030655)             |                | 3                  |                |                    |                | 2                  |                | 1                  |
|                            | *10 (rs1065852)            |                | 6                  |                | 22                 |                |                    | 2              | 1                  |
|                            | *9 (rs5030656)             |                | 1                  |                |                    |                | 2                  |                | 1                  |
| rs16947, no rs5758550 (H3) | *17 (rs28371706)           |                |                    |                |                    | 92             | 41 <sup>a</sup>    | 2              |                    |
|                            | *4 (rs3892097 & rs1065852) |                | 18                 |                | 1                  |                | 5                  |                | 10                 |
|                            | *3 (rs35742686)            |                | 1                  |                |                    |                | 1                  |                |                    |
|                            | *6 (rs5030655)             |                | 2                  |                |                    | 4              | 2 <sup>a</sup>     |                |                    |
|                            | *10 (rs1065852)            |                | 1                  | 3              | 20                 |                | 2                  |                |                    |
|                            | *9 (rs5030656)             |                | 1                  |                |                    | 3              | 1 <sup>a</sup>     |                | 1                  |
|                            | *17 (rs28371706)           |                |                    |                |                    | 13             | 27                 |                |                    |

note: <sup>a</sup> homozygous carrier

Supplemental Table 5. Genotyping panel and association between allelic variants and CYP2D6 enzyme activity

| Functional status | Activity score | Alleles or SNPs                                                                                                                                         |
|-------------------|----------------|---------------------------------------------------------------------------------------------------------------------------------------------------------|
| Normal activity   | 1              | *1                                                                                                                                                      |
| Reduced activity  | 0.5            | *2, *9, *10, *17 and other rare alleles (*49, *50, *54, *55, *59, *69, *72)                                                                             |
| No activity       | 0              | *3, *4, *5, *6 and other rare alleles (*7, *8, *11, *12, *13, *14, *15, *16, *18, *19, *20, *21, *31, *36, *38, *40, *42, *44, *47, *51, *56, *57, *62) |
| Enhanced activity | >1             | rs5758550, gene copy number variations                                                                                                                  |

**Supplemental Table 6. CYP2D6 Variants Detected in GeneSight Assay Platform**

CYP2D6 \*1, \*2 (NM\_000106.5:c.886C>T; c.1457G>C), \*2A (NM\_000106.5:c.-1584C>G; c.886C>T; c.1457G>C), \*3 (NM\_000106.5:c.775delA), \*4 (NM\_000106.5:c.506-1G>A; c.100C>T; c.1457G>C), \*5 (CYP2D6 Deletion), \*6 (NM\_000106.5:c.454delT), \*7 (NM\_000106.5:c.971A>C), \*8 (NM\_000106.5:c.505G>T; c.886C>T; c.1457G>C), \*9 (NM\_000106.5:c.841\_843delAAG), \*10 (NM\_000106.5:c.100C>T; c.1457G>C), \*11, \*12 (NM\_000106.5:c.124G>A; c.886C>T; c.1457G>C), \*14 (NM\_000106.5:c.505G>A; c.886C>T; c.1457G>C), \*15, \*17 (NM\_000106.5:c.320C>T; c.886C>T; c.1457G>C), \*41 (NM\_000106.5:c.985+39G>A; c.886C>T; c.1457G>C), gene duplication;

**Supplemental Table 7. CYP2D6 alleles in HLMs**

| <b>Allele</b> | <b>Allele count</b> | <b>Minor allele frequency</b> |
|---------------|---------------------|-------------------------------|
| CYP2D6*1      | 85                  | 0.348                         |
| CYP2D6 *2     | 3                   | 0.012                         |
| CYP2D6 *2A    | 64                  | 0.262                         |
| CYP2D6 *3     | 5                   | 0.020                         |
| CYP2D6 *4     | 38                  | 0.156                         |
| CYP2D6 *5     | 8                   | 0.033                         |
| CYP2D6 *6     | 1                   | 0.004                         |
| CYP2D6 *9     | 8                   | 0.033                         |
| CYP2D6 *10    | 3                   | 0.012                         |
| CYP2D6 *17    | 4                   | 0.016                         |
| CYP2D6 *41    | 25                  | 0.102                         |
|               |                     |                               |
| total         | 244                 |                               |

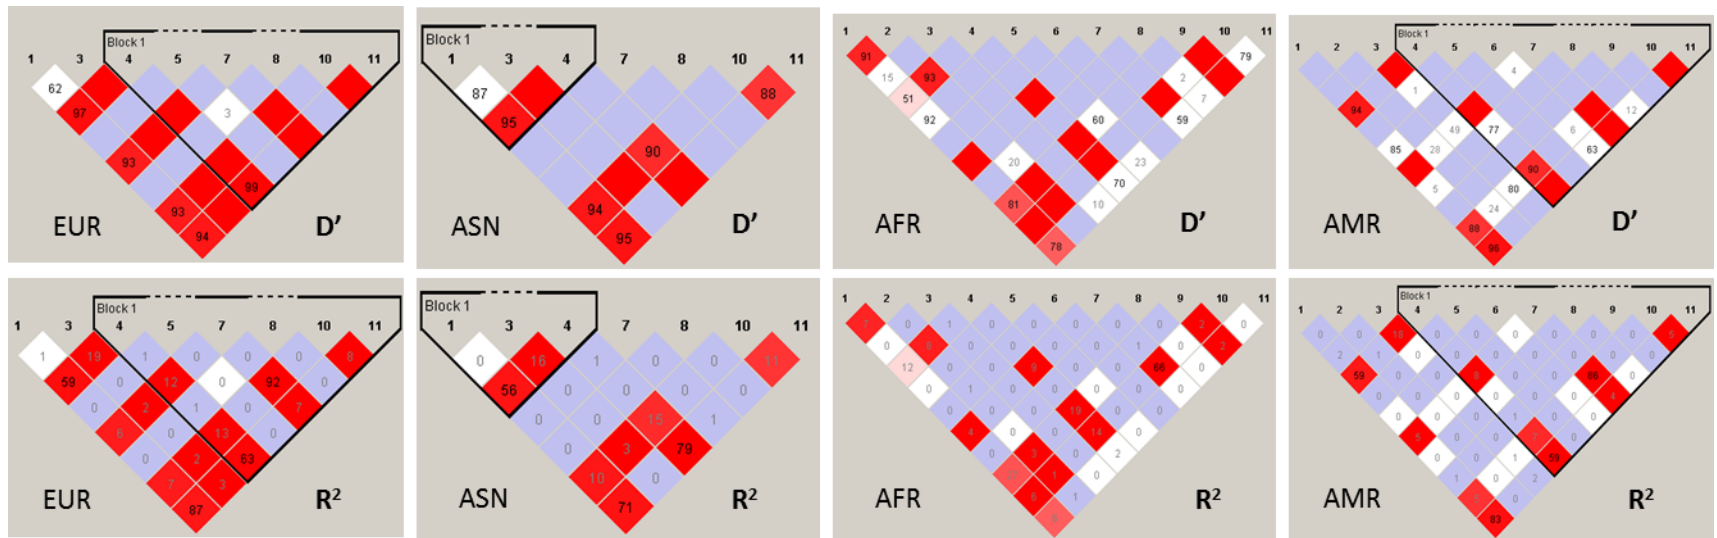

Supplemental figure 1. Linkage disequilibrium (LD) values for 11 SNPs in different populations. The identity and location of SNPs 1-11 are provided in Table 1. The number in each square represents the  $R^2$  or  $D'$  LD value. Note the high LD between SNP1 (enhancer rs5758550) and SNP4 (\*2 allele), and other upstream SNPs, all >100kb distant from SNP1. SNP2, SNP6 and SNP9 are absent in EUR and ASN. EUR: European Ancestry, ASN: Asian Ancestry, AFR: African Ancestry, AMR: Americas Ancestry.



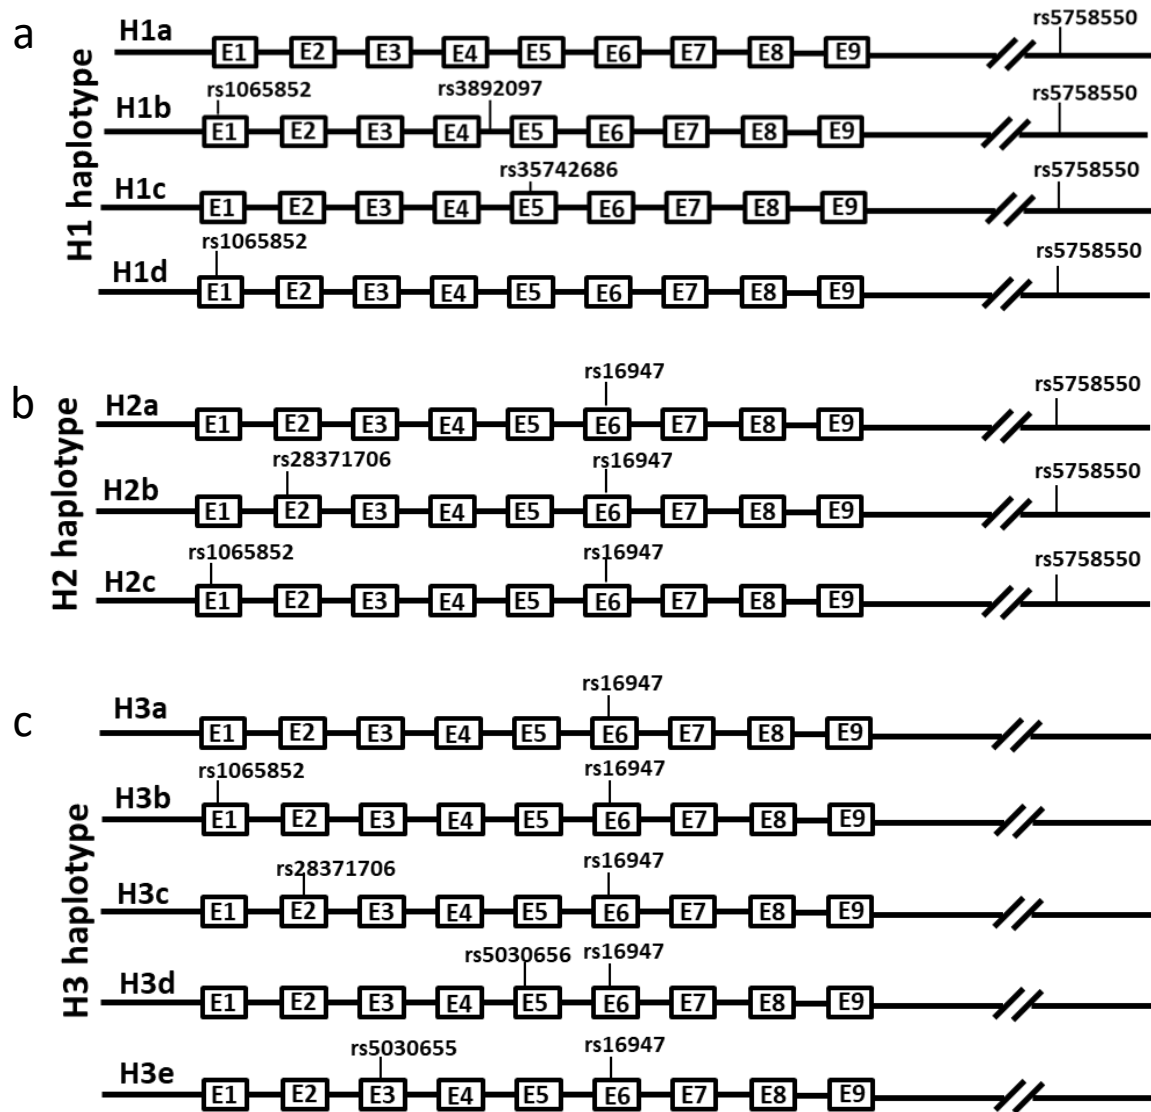

Supplemental Figure 2. Haplotype structural map of haplotypes H1 (a), H2 (b), and H3(c).
